# Supplementary material for: Modulated Modularity Clustering as an Exploratory Tool for Functional Genomic Inference
Source: PubMed Central journal article supplement (PMC2673040; doi:10.1371/journal.pgen.1000479), 2009-05-08
Supplement: pgen.1000479.s001.pdf [file pgen.1000479.s001.pdf]

FIGURE S1

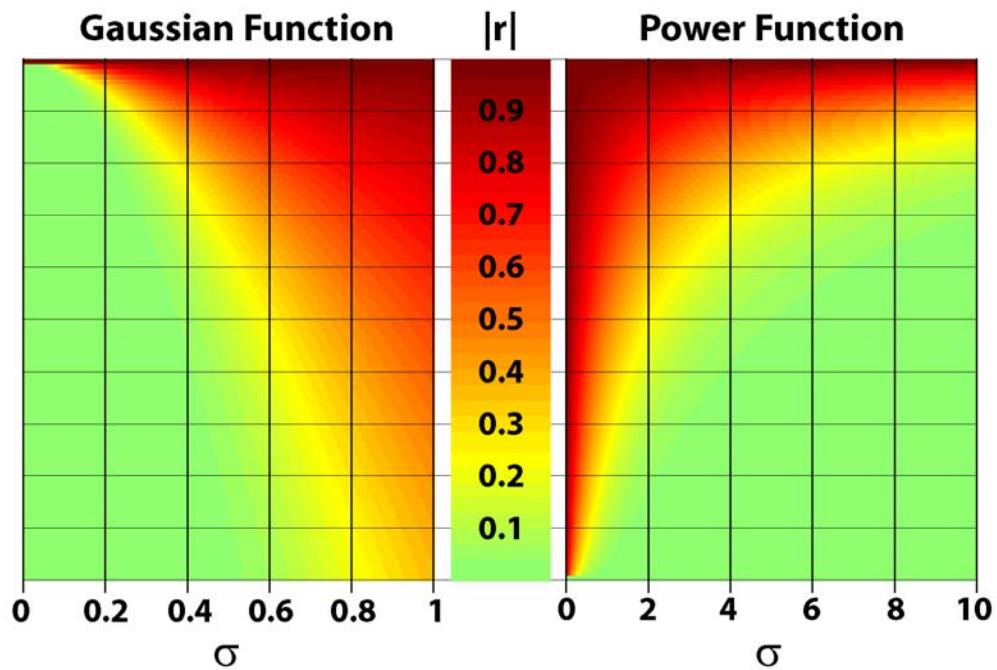

Figure S1 | Comparison of monotone transformations

The absolute correlation coefficient  $|r|$  is compared to its value after transformation by each of two nonlinear monotone functions. On the left is the Gaussian function used by MMC which transforms  $|r|$  into  $e^{(|r|-1)/\sigma^2}$ . On the right is the power function  $|r|^\sigma$ . Note that the  $x$ -axis of the power function is coarser than that of the Gaussian function by a factor of ten.
